# Supplementary material
Source: PubMed Central journal article supplement (PMC5888910)
Supplement: kwx332sagivwebmaterialfinal.pdf [file kwx332sagivwebmaterialfinal.pdf]

**Web Table 1.** Associations of Prenatal Plasma Concentrations of Perfluoroalkyl Substances (PFAS) With Birth Weight (g) Among Term Births ( $\geq 37$  Weeks' Gestation) for Participants in Project Viva ( $n = 1,524$ )

|                             | Range<br>(ng/mL) | No.   | Adjusted <sup>a</sup> |               | Adjusted <sup>a</sup> + GFR-CG <sup>b</sup> |              | Adjusted <sup>a</sup> + Albumin |               |
|-----------------------------|------------------|-------|-----------------------|---------------|---------------------------------------------|--------------|---------------------------------|---------------|
|                             |                  |       | $\beta$               | 95% CI        | $\beta$                                     | 95% CI       | $\beta$                         | 95% CI        |
| <b>PFOS</b>                 |                  |       |                       |               |                                             |              |                                 |               |
| Continuous IQR <sup>c</sup> | 0.1–185.0        | 1,524 | -17.90                | -40.9, 5.1    | -15.1                                       | -38.5, 8.3   | -19.3                           | -42.5, 3.9    |
| Quartile 1                  | 0.1–18.8         | 395   | 0 (referent)          |               | 0 (referent)                                |              | 0 (referent)                    |               |
| Quartile 2                  | 18.9–25.6        | 378   | -27.8                 | -93.3, 37.7   | -22.9                                       | -88.9, 43.0  | -29.1                           | -94.6, 36.5   |
| Quartile 3                  | 25.7–34.8        | 378   | -36.3                 | -102.8, 30.2  | -29.9                                       | -97.2, 37.5  | -38.3                           | -105.0, 28.3  |
| Quartile 4                  | 34.9–185.0       | 373   | -57.6                 | -125.2, 10.0  | -48.3                                       | -117.7, 21.0 | -60.9                           | -128.8, 7.1   |
| <b>PFOA</b>                 |                  |       |                       |               |                                             |              |                                 |               |
| Continuous IQR <sup>c</sup> | 0.3–49.3         | 1,524 | -18.5                 | -45.4, 8.3    | -15.4                                       | -42.6, 11.9  | -20.0                           | -47.0, 7.0    |
| Quartile 1                  | 0.3–4.1          | 386   | 0 (referent)          |               | 0 (referent)                                |              | 0 (referent)                    |               |
| Quartile 2                  | 4.2–5.8          | 380   | -8.3                  | -75.2, 58.6   | -5.1                                        | -72.1, 62.0  | -9.9                            | -77.0, 57.1   |
| Quartile 3                  | 5.9–7.9          | 386   | -60.3                 | -129.2, 8.7   | -53.7                                       | -123.3, 16.0 | -63.1                           | -132.3, 6.1   |
| Quartile 4                  | 8.0–49.3         | 372   | -36.7                 | -107.4, 34.0  | -28.4                                       | -100.3, 43.4 | -40.4                           | -111.5, 30.8  |
| <b>PFHxS</b>                |                  |       |                       |               |                                             |              |                                 |               |
| Continuous IQR <sup>c</sup> | 0.1–74.5         | 1,524 | -2.8                  | -16.0, 10.5   | -1.9                                        | -15.2, 11.4  | -3.0                            | -16.3, 10.2   |
| Quartile 1                  | 0.1–1.6          | 388   | 0 (referent)          |               | 0 (referent)                                |              | 0 (referent)                    |               |
| Quartile 2                  | 1.7–2.4          | 386   | -37.5                 | -103.0, 28.1  | -32.2                                       | -98.0, 33.7  | -39.9                           | -105.7, 26.0  |
| Quartile 3                  | 2.5–3.7          | 363   | 44.9                  | -22.4, 112.1  | 51.9                                        | -15.9, 119.7 | 42.7                            | -24.8, 110.2  |
| Quartile 4                  | 3.8–74.5         | 387   | -10.8                 | -78.1, 56.6   | -2.7                                        | -70.7, 65.3  | -13.8                           | -81.6, 54.0   |
| <b>PFNA</b>                 |                  |       |                       |               |                                             |              |                                 |               |
| Continuous IQR <sup>c</sup> | 0.1–6.0          | 1,524 | -28.2                 | -52.0, -4.4   | -25.6                                       | -49.8, -1.3  | -29.9                           | -54.0, -5.9   |
| Quartile 1                  | 0.1–0.4          | 311   | 0 (referent)          |               | 0 (referent)                                |              | 0 (referent)                    |               |
| Quartile 2                  | 0.5–0.6          | 439   | -4.1                  | -71.9, 63.6   | 0.5                                         | -67.7, 68.8  | -6.9                            | -74.9, 61.0   |
| Quartile 3                  | 0.7–0.9          | 431   | -85.0                 | -153.5, -16.6 | -78.7                                       | -148.1, -9.2 | -89.2                           | -158.1, -20.3 |
| Quartile 4                  | 1.0–6.0          | 343   | -62.8                 | -136.1, 10.4  | -54.3                                       | -129.2, 20.5 | -69.2                           | -143.3, 4.9   |

<sup>a</sup> Adjusted for maternal age at enrollment, race/ethnicity, education, prenatal smoking, parity, history of breastfeeding, prepregnancy body mass index, paternal education, household income, child's sex, and gestational age at blood draw.

<sup>b</sup> Glomerular filtration rate computed with the Cockcroft-Gault formula (mL/minute per 1.73 m<sup>2</sup>).

<sup>c</sup> Interquartile ranges (ng/mL) for PFAS are PFOS = 16.0; PFOA = 3.8; PFHxS = 2.2; PFNA = 0.4.
